# Supplementary material
Source: Research Square preprint supplement (doi:10.21203/rs.3.rs-9071284/v1)
Supplement: Supplementary file 1 [file 222dc963b792086ef51cad14.pdf]

Supplementary Materials for

**Calreticulin-Targeting L-Asparaginase-Flagellin Conjugate  
Enhances *Salmonella*-Mediated Antitumor Efficacy**

Dinh-Huy Nguyen *et al.*

**Corresponding authors:**

Yeongjin Hong ([yjhong@jnu.ac.kr](mailto:yjhong@jnu.ac.kr)), Jung-Joon Min ([jjmin@jnu.ac.kr](mailto:jjmin@jnu.ac.kr)), and Wan-Sik Lee ([iliad@jnu.ac.kr](mailto:iliad@jnu.ac.kr))

**This PDF file includes:**

Materials and Methods

Figures S1 to S7

Tables S1 to S2

## **Materials and Methods**

### **Measurement of binding affinity using surface plasmon resonance analysis**

Binding kinetics of CRT3LFP to CRT were determined by surface plasmon resonance using a Biacore X100 instrument (Cytiva, USA). rCRT was immobilized on a Series S Sensor Chip CM5 via amine coupling to a density of approximately 1,000–2,000 response units (RU). CRT3LFP was prepared in running buffer [10 mM HEPES (pH 7.4), 150 mM NaCl, 0.05% Tween-20] and injected as analyte in a multi-cycle kinetic series at concentrations ranging from 0.3 to 130 nM (two-fold serial dilutions). Association was monitored for 180 - 300 seconds, and dissociation for 600 - 1,200 seconds at a flow rate of 30 - 50  $\mu$ L/min. The surface was regenerated with 10 mM glycine-HCl pH 2.0 - 2.5 (or the appropriate regeneration condition). Sensorgrams were fitted to a 1:1 Langmuir binding model using Biacore X100 Evaluation Software to derive the association rate constant ( $k_a$ ), dissociation rate constant ( $k_d$ ), and equilibrium dissociation constant ( $K_D = k_d/k_a$ ).

### **L-ASNase activity assay**

L-ASNase activity was assessed following the method of Wriston and Yellin<sup>51</sup>, which measures ammonia liberation via nesslerization. The reaction mixture comprised 1.5 mL of 0.04 M L-asparagine in 0.05 M Tris-HCl buffer (pH 8.6) and 0.5 mL of enzyme solution, resulting in a total volume of 2 mL. This mixture was incubated at 37°C for 30 min, and the reaction was terminated by adding 0.5 mL of 1.5 M trichloroacetic acid (TCA). A control was prepared by adding TCA to the enzyme solution prior to mixing with the substrate. Post-reaction, the mixture was centrifuged at 10,000 $\times$ g for 15 min to remove precipitated proteins, and the supernatant was collected. For ammonia quantification, 0.5 mL of supernatant was diluted to 7 mL with distilled water, followed by the addition of 1 mL of Nessler's reagent. After 20 min, OD480 was measured. Ammonia concentration was determined using a standard curve established with ammonium sulfate solutions. One international unit (IU) of L-ASNase activity is defined as the enzyme quantity catalyzing the release of 1  $\mu$ mol of ammonia per minute at 37°C and pH 8.6.

### **Protein stability assay in serum**

100  $\mu$ L of CRT3LFP [60  $\mu$ g or 8 IU in PBS (pH 7.4)] was mixed with the same volume of mouse blood serum in a low-binding 1.5-mL microcentrifuge tube and incubated at 37°C. The

aliquots (10  $\mu$ L) were withdrawn at predefined time points and immediately cooled on ice. L-ASNase activity of each aliquot was determined as described above. The enzyme activity percentage = [(enzyme activity in CRT3LFP + serum) - (enzyme activity in serum alone) at the indicated time]/[(enzyme activity in CRT3LFP + serum) - (enzyme activity in serum alone) at t = 0] x 100. Recombinant L-ASNase was used as positive control.

### **FlaB activity assay**

HEK293/mTLR5 cells ( $3 \times 10^4$ ) were plated in 96-well plates and incubated overnight at 37°C. The cells were transiently transfected with 100 ng of pNiFty(2)-SEAP (Cat. code: 293-htr5, InvivoGen, Hong Kong), a plasmid expressing a secreted embryonic alkaline phosphatase (SEAP) after activation of the mTLR5-NF- $\kappa$ B signaling pathway, in 10  $\mu$ L Turbofectin reagent (Cat. code: TF81001, Origene, USA). After incubation for a day, the cells were replaced with 180  $\mu$ L of fresh DMEM supplemented with 10% heat-inactivated FBS and then treated with 20  $\mu$ L of 4 nM CRT3LFP. The purified FlaB was used as a positive control. After 6 h of incubation, 20  $\mu$ L of culture supernatants were transferred into each well of a 96-well plate, and 180  $\mu$ L of alkaline phosphatase detection reagent QUANTI-Blue™ (InvivoGen, USA) was added to each well. After 3 h, the OD620 value of each well was measured using a microplate reader to quantify SEAP activity.

### ***In vitro* binding assay of CRT3LFP against the tumor cells treated with CNC018**

CT26 or MC38 cells ( $2 \times 10^5$  cells) were cultured overnight in DMEM supplemented with 10% FBS at 37°C in a 5% CO<sub>2</sub> atmosphere on 6-well plates. The medium was removed by aspiration, and fresh DMEM without antibiotics containing CNC018 ( $2 \times 10^6$  CFU/mL) was added to each well. The cells were incubated for 22 h, followed by a 2 h treatment with penicillin-streptomycin (LS203-01, Welgene, Korea) to be a final 1% concentration. Then, the cells were detached using 0.05% trypsin-EDTA (LS-015-01, Welgene, Korea) and washed three times with FACS buffer (1% FBS in PBS; OPBDPWO50, Welgene, Korea). To assess CRT exposed on the cell surface, cells were treated with 50-fold diluted PE-conjugated anti-CRT antibody (19780S, Cell Signaling, USA) for 30 min and incubated on ice. The same cells were treated with 100 nM CRT3LFP as well as DGRLFP and CRT3LP for 1 h on ice. All the treated cells were washed five times with FACS buffer and treated with an anti-His tag monoclonal

antibody (1:1,000 dilution, ab245114, Abcam, USA) for 1 h. After simple washing, the cells were treated with 5  $\mu\text{g}/\text{mL}$  Alexa Fluor 488-conjugated secondary antibody (A11008, Thermo Scientific, USA) for 1 h. Fluorescence signals of the cells were analyzed using a FACS Canto II flow cytometer (BD Biosciences, USA) and FlowJo software (Becton, Dickinson & Company, USA).

### **Confocal immunofluorescence imaging analysis**

CRT3LFP, as well as DGRLFP and CRT3LP bound to CRT exposed on cell membranes, were visualized as previously described using confocal immunofluorescence microscopy<sup>6</sup>. CT26 and MC38 cells ( $1 \times 10^4$ ) were cultured overnight on cover glass and treated with CNC018 ( $1 \times 10^5$ ) at 37°C for 22 h. Thereafter, the cells were fixed with 1% paraformaldehyde (PFA; Biosesang, South Korea) for 15 min and then sequentially stained with anti-CRT antibody (1:1000 dilution) on ice for 1 h and Alexa Fluor 488-conjugated secondary antibody (5  $\mu\text{g}/\text{mL}$ ) for 1 h. The same processed cells were incubated with 100 nM recombinant proteins on ice for 1 h and then sequentially stained with anti-His tag monoclonal antibody (1:1,000 dilution) for 1 h and Alexa Fluor 488-conjugated secondary antibody (5  $\mu\text{g}/\text{mL}$ ) for 1 h.

Cell membranes were labeled with Alexa Fluor 555-conjugated wheat germ agglutinin (WGA) (1:5,000 dilution; Thermo Fisher Scientific, USA). Samples were washed with cold 1% Tween-PBS between each step. Nuclei were stained with 4',6-diamidino-2-phenylindole (DAPI) (Cat# P36931, Thermo Fisher Scientific, USA). The staining with anti-CRT antibody (1:1000 dilution) was also done using sequential staining with anti-CRT and Alexa Fluor 488-conjugated secondary antibodies.

Imaging was performed using an LSM510 confocal microscope (ZEISS, Jena, Germany), and data were analyzed with ZEN-LSM imaging software (ZEISS, Jena, Germany).

### **Cell viability assay**

CT26 and MC38 cells ( $10^4$ ) were plated in three wells of a 96-well plate and cultured at 37°C. The next day, the culture medium was replaced by 100  $\mu\text{L}$  of fresh media containing CNC018 bacteria ( $10^5$  CFU). After 18 hours of culture, penicillin-streptomycin was added to each well to achieve a final concentration of 1%, and the culture continued for an additional 2 hours. The

PBS-washed cells were treated with 5 IU/mL of CRT3LFP as well as CRTLP and DGR-LFP and cultured for 4 h at 37°C. Then, CCK-8 reagent (10 µL) was added to each well and incubated at 37°C for 1-2 h. The OD450 value at each well was measured as a viable cell level by a SpectraMax M2 microtiter plate reader (Molecular Devices, USA).

### ***In vivo* toxicity assay of CRT3LFP in mice**

Female 7-week-old BALB/c mice (Samtako, Korea) were implanted subcutaneously (*s.c.*) with CT26 cells ( $5 \times 10^5$ ) in the right flank. When the tumor volumes reached approximately 100-120 mm<sup>3</sup> in volume, CRT3LFP (4, 8, or 12 IU) was *i.p.* injected into mice. PBS was used as an untreated control. Body weight, tumor size, and survival of mice were observed at the indicated days.

## Supplementary figures

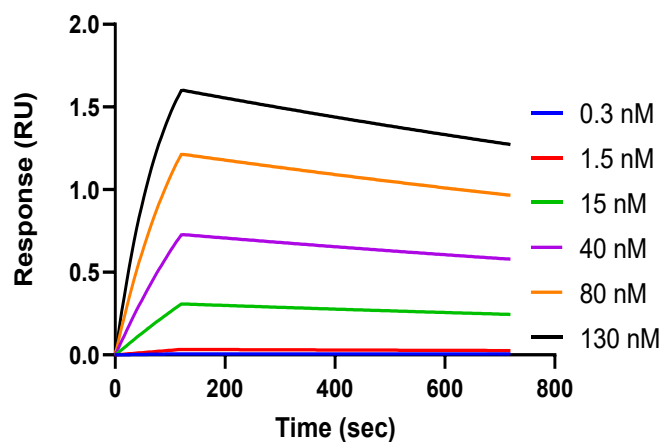

**Figure S1. The binding affinity of CRT3LFP to calreticulin (CRT) is determined by surface plasmon resonance (SPR).** Sensorgrams showing the real-time binding of CRT3LFP (analyte) at various concentrations (0.3 nM, blue; 1.5 nM, red; 15 nM, green; 40 nM, purple; 80 nM, orange; 130 nM, black) to immobilized CRT (ligand). The curves display association and dissociation phases, with global fitting to a 1:1 binding model yielding an equilibrium dissociation constant ( $K_D$ ) of  $4.52 \times 10^{-9}$  M, an association rate constant ( $k_a$ ) of  $8.51 \times 10^4$  M<sup>-1</sup>s<sup>-1</sup>, and a dissociation rate constant ( $k_d$ ) of  $3.85 \times 10^{-4}$  s<sup>-1</sup>.

**A**

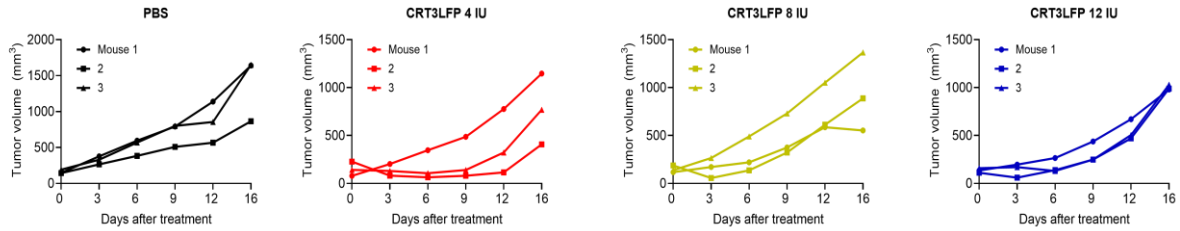

**B**

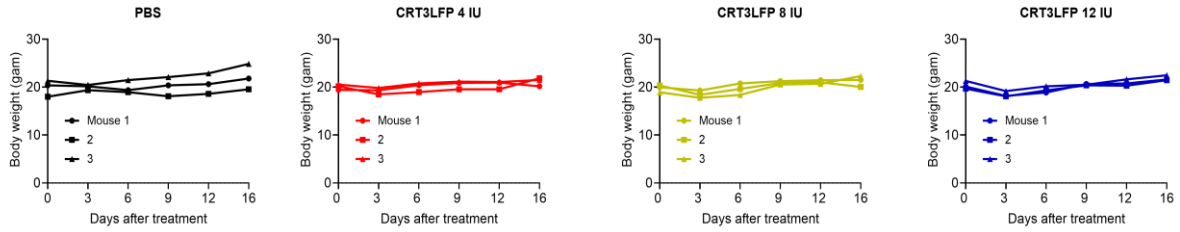

**Figure S2. Evaluation of tumor growths and body weight changes in individual CT26 tumor-bearing mice treated with CRT3LFP (related to Figure 4).**

**(A)** Tumor growth curves in individual mice treated with PBS or CRT3LFP (4 IU, 8 IU, or 12 IU).

**(B)** Body weight changes in individual mice treated with PBS or CRT3LFP (4 IU, 8 IU, or 12 IU).

**A**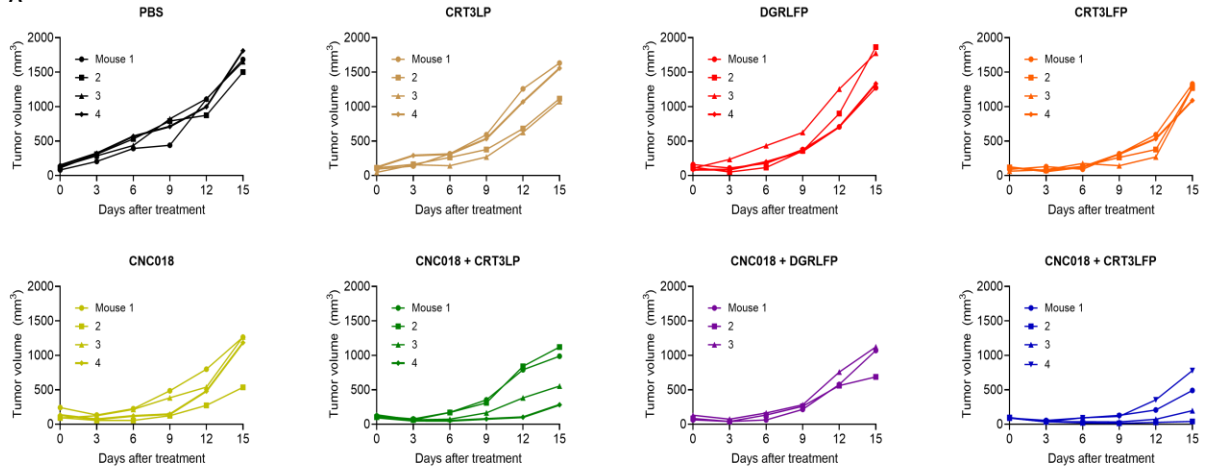**B**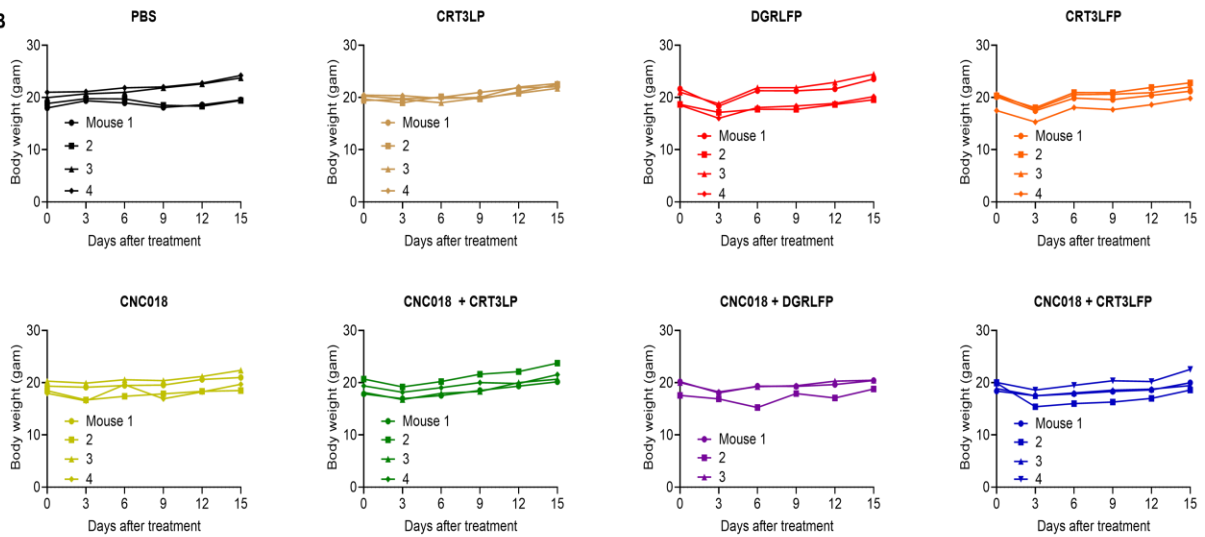**C**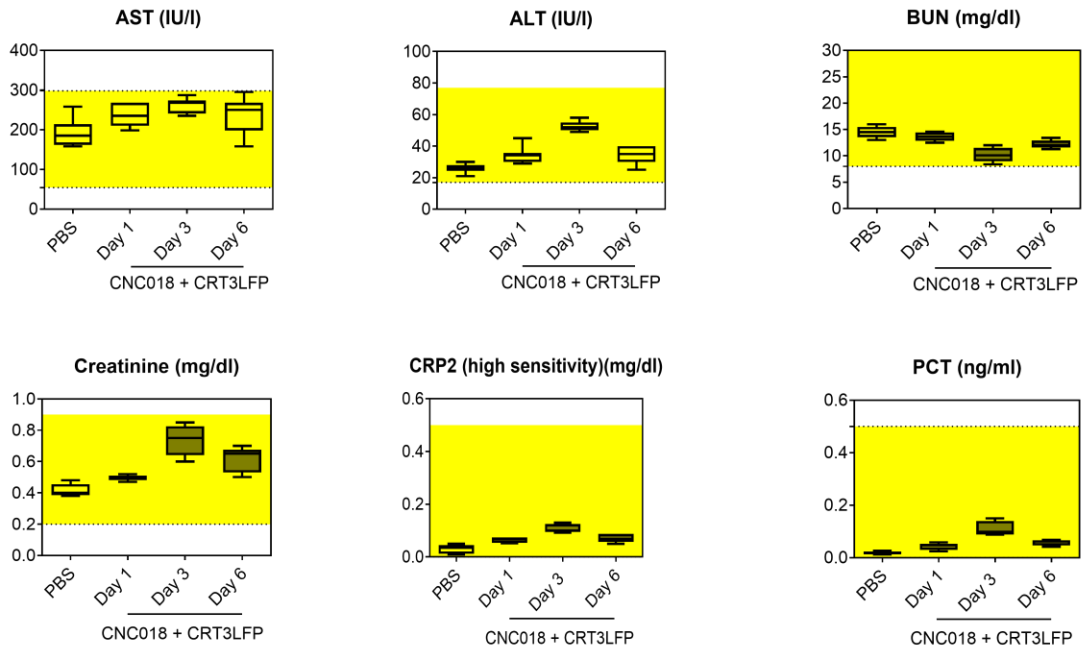

**Figure S3. Therapeutic effects of CNC018 and CRT3LFP co-treated in individual CT26 tumor-bearing mice** (related to Figure 5). **(A)** Individual tumor growth curves in CT26 tumor-bearing mice co-treated with the indicated treatments. CNC018 ( $2 \times 10^7$  CFU) was *i.v.* administered on day 0. The proteins (CRT3LP, DGR-LFP, and CRT3LFP; 8 IU/injection) were *i.p.* given five times with a 1-day interval from day 1. PBS was treated as a control. **(B)** Body weight changes in individual mice across treatment groups listed in (A). **(C)** Systemic toxicity profile in CT26 tumor-bearing mice co-treated with CNC018 ( $2 \times 10^7$  CFU) and CRT3LFP (4 IU/injection) combined with CNC018. Serum levels of aspartate aminotransferase (AST), alanine aminotransferase (ALT), blood urea nitrogen (BUN), creatinine, plasma C-reactive protein (CRP), and procalcitonin were measured on days 1, 3, and 6 post-treatments. Sera of PBS-treated mice were controlled. Boxes indicate the interquartile range; whiskers denote the 10th and 90th percentiles. Reference ranges: ALT 17–77 IU/L, AST 54–298 IU/L, blood urea nitrogen 8–33 mg/dl, creatinine 0.2–0.9 mg/dl, CRP < 0.5 mg/dl, procalcitonin < 0.5 ng/ml. Yellow-shaded areas indicate the normal range for each parameter.

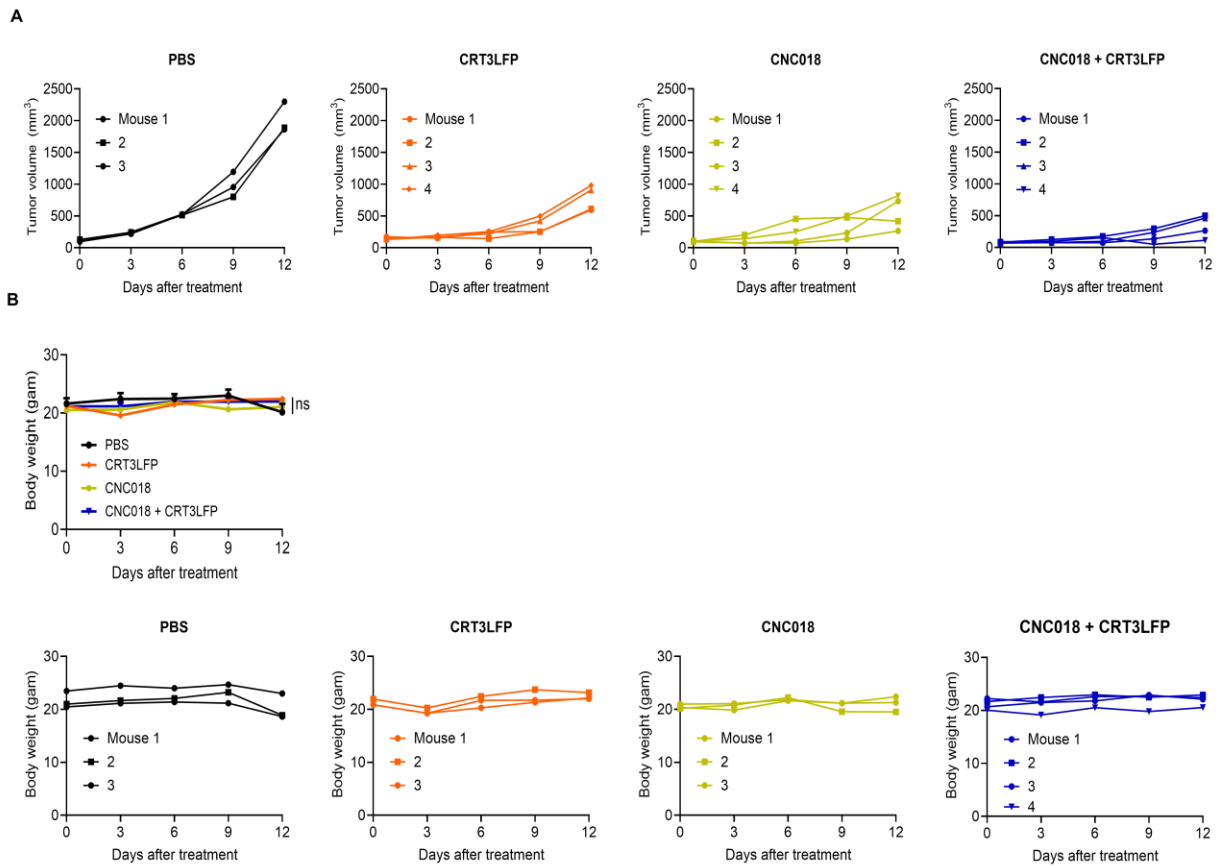

**Figure S4. Therapeutic effects of CNC018 and CRT3LFP co-treated in individual MC38 tumor-bearing mice** (related to Figure 5E, G). CNC018 ( $2 \times 10^7$  CFU) was *i.v.* administered on day 0. CRT3LFP (8 IU/injection) was *i.p.* given five times with a 1-day interval from day 1. **(A)** Individual tumor growth curves in MC38 tumor-bearing mice. **(B)** Individual body weight changes in mice of (A).

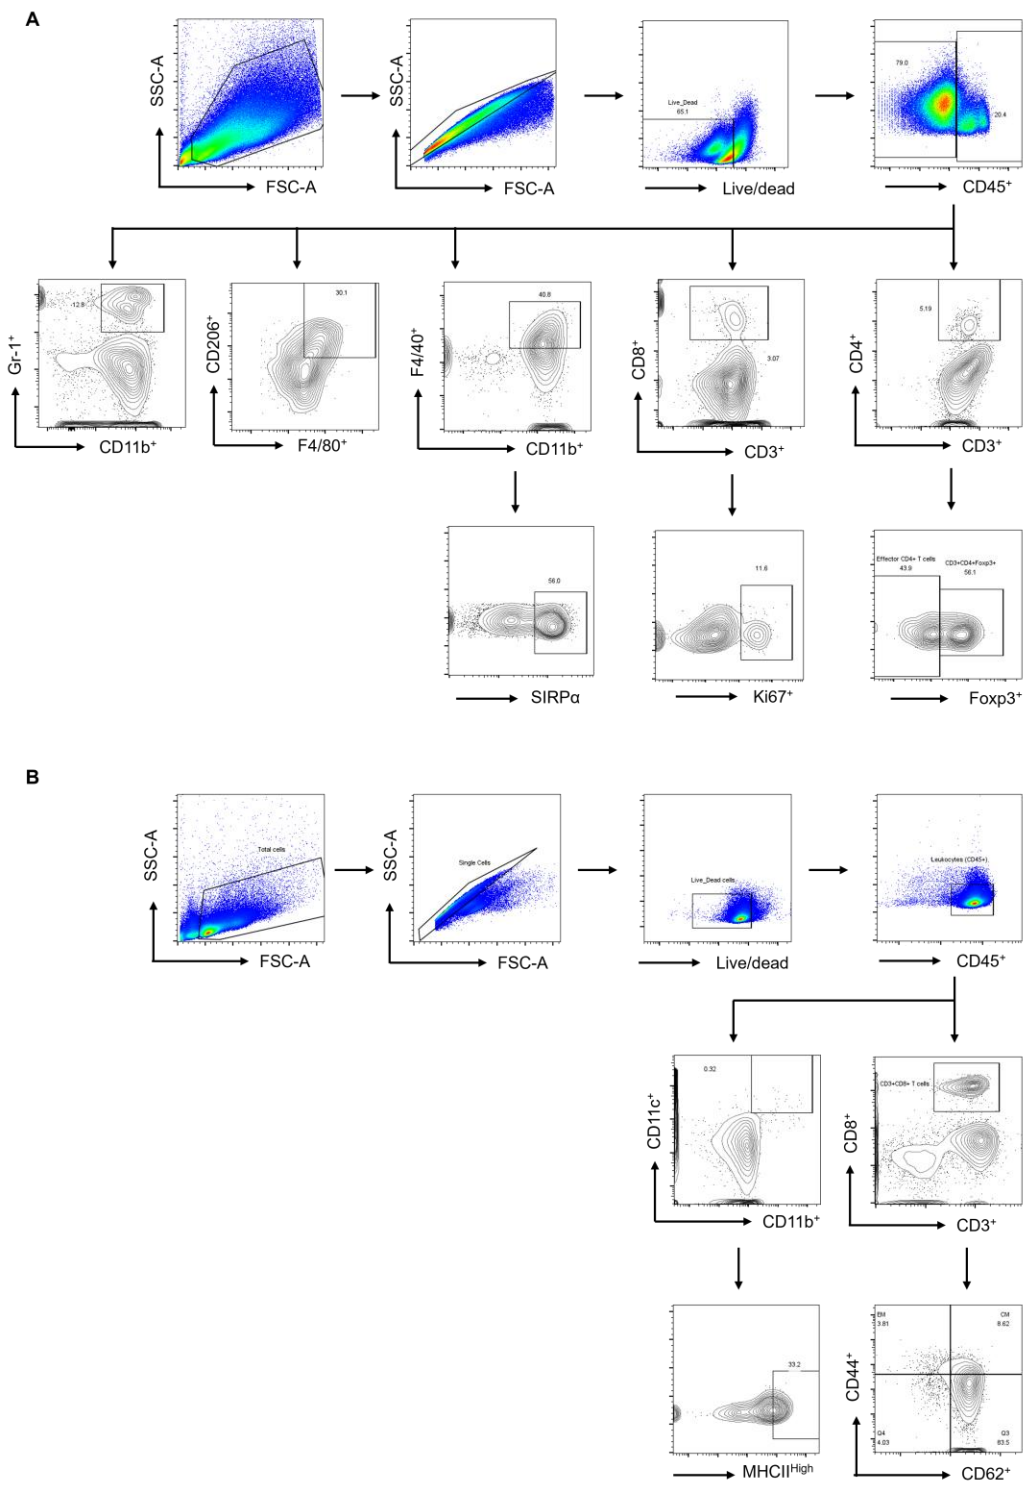

**Figure S5. Gating strategies of flow cytometry analysis in CT26 tumor tissues and tumor-draining lymph nodes (TdLNs)** (related to Figure 6A-H). After harvesting cells in tumor tissues and TdLNs, they were stained with a Live/Dead cell kit, anti-CD45 (leukocyte marker), anti-CD16/CD32 (to block non-specific Fc receptor binding), and additional immune cell-specific antibodies. **(A)** Gating strategy for tumor tissue analysis. **(B)** Gating strategy for TdLN analysis

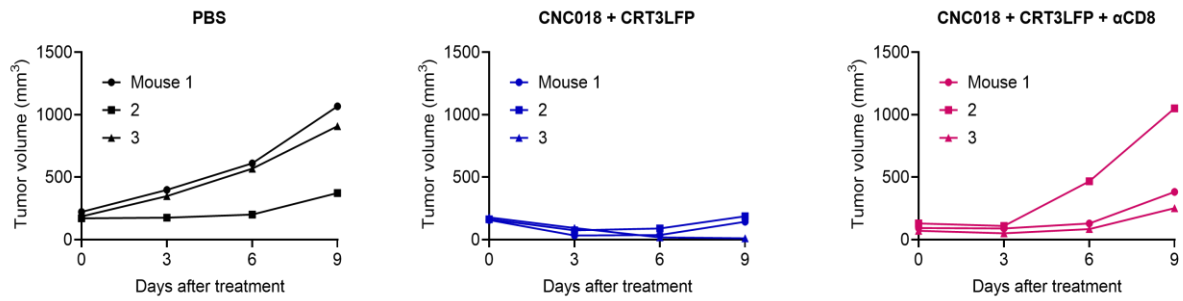

**Figure S6. CD8<sup>+</sup> T cell depletion effect in individual CT26 tumor-bearing BALB/c mice co-treated with CNC018 and CRT3LFP** (related to Figure 6J). CT26 s.c. tumor-bearing BALB/c mice were *i.v.* treated with CNC018 ( $2 \times 10^7$  CFU) on day 0, and subsequently *i.p.* treated with CRT3LFP (4 IU/injection) five times from day 1 with a 1-day interval. Anti-CD8 ( $\alpha$ CD8) antibody (200  $\mu$ g/injection) was *i.p.* administrated three times with a 3 - 4 days interval. Individual tumor growth curves are shown.

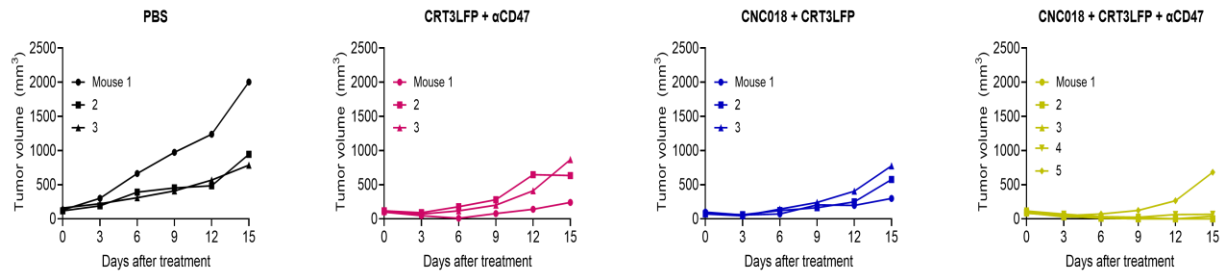

**Figure S7. CD47 blockade enhances antitumor therapeutic effect in mice co-treated with CNC018 and CRT3LFP** (related to Figure 7E). Mice bearing CT26 tumors (~100-120 mm<sup>3</sup>) received CNC018 ( $2 \times 10^7$  CFU, day 0, *i.v.* injection) and/or CRT3LFP (4 IU, five-time *i.p.* injections with a 1-day interval from day 1).  $\alpha$ CD47 antibody (200  $\mu$ g/injection) was *i.p.* administered five times with a 2-day interval from day 0. Individual tumor growth curves of CT26 tumor-bearing mice are shown.

**Table S1. Antibodies used in this study.**

| Ab ID                                                    | Ab description                     | Manufacturer/Catalogue number | Application    |
|----------------------------------------------------------|------------------------------------|-------------------------------|----------------|
| Calreticulin (D2E6) XP Rabbit mAb                        | Monoclonal Ab                      | Cell Signaling/12238          | Elisa          |
| Anti-Calreticulin                                        | Monoclonal Ab                      | Thermal Fisher/MA5-15382      |                |
| L-asparaginase                                           | Polyclonal antibody                | Abcam/ab55824                 |                |
| Calreticulin (D3E6) XP® Rabbit mAb (PE Conjugate)        | Clone D3E6                         | Cell Signalling/19780S        | Flow cytometry |
| Rabbit (DA1E) mAb IgG XP® Isotype Control (PE Conjugate) | Clone DA1E                         | Cell Signalling/5742S         |                |
| Anti-His tag                                             | Monoclonal Ab                      | Abcam/ab245114                |                |
| Goat anti-rabbit secondary antibody, Alexa Flour 488     |                                    | Thermo Scientific/A11008      |                |
| Anti-mouse CD16/32                                       | TruStain FcX™ Fc blocking solution | BioLegend/101320              |                |
| Live/dead Fixable aqua dead cell stain kit               |                                    | Invitrogen/L34957             |                |
| Pacific Blue anti-mouse CD45.2 antibody                  | Specific monoclonal Ab             | BioLegend/109820              |                |

|                                                               |               |                        |
|---------------------------------------------------------------|---------------|------------------------|
| Anti-mouse CD3-FITC                                           | Clone 17A2    | eBioscience/11-0032-82 |
| Anti-mouse 11b-FITC                                           | Clone M1/70   | BioLegend/101205       |
| Anti-mouse CD8a-PE                                            | Clone 53-6.7  | eBioscience/12-0081-82 |
| PE anti-mouse CD172a (SIRP $\alpha$ ) Antibody (PE Conjugate) | Clone P84     | Biolegend/144012       |
| Rat IgG1, $\kappa$ Isotype Ctrl Antibody (PE Conjugate)       | Clone RTK2071 | Biolegend/400408       |
| Anti-mouse CD47 Antibody (PE Conjugate)                       | Clone miap301 | Biolegend/127508       |
| Rat IgG2a, $\kappa$ Isotype Ctrl Antibody (PE Conjugate)      | Clone RTK2758 | Biolegend/ 400508      |
| Anti-mouse CD4-APC                                            | Clone GK1.5   | BioLegend/100412       |
| Anti-mouse CD49-APC                                           | Clone DX5     | BioLegend/108909       |
| Anti-mouse CD206-APC                                          | Clone B7-H1   | BioLegend/C068C2       |
| Anti-mouse CD11c-APC                                          | Clone N418    | Biolegend/117310       |
| Anti-mouse granzyme B-PerCP-Cy5.5                             | Clone QA16A02 | BioLegend/372212       |

|                              |                   |                                     |                              |
|------------------------------|-------------------|-------------------------------------|------------------------------|
| Anti-mouse CD62L-PerCP-Cy5.5 | Clone MEL-14      | BioLegend/104432                    |                              |
| Anti-mouse MHCII-PerCP-Cy5.5 | Clone M5/114.15.2 | BioLegend/107625                    |                              |
| Anti-mouse Ly-6G-PerCP-Cy5.5 | Clone RB6-8C5     | BioLegend/127615                    |                              |
| Anti-mouse F4/80-PerCP-Cy5.5 | Clone BM8         | BioLegend/123128                    |                              |
| Anti-mouse Ki67-PE-Cy7       | Clone SolA15      | Thermo Fisher Scientific/25469882   |                              |
| PE/Cy7 anti-mouse CD152      | Clone UC10-4B9    | BioLegend/106313                    |                              |
| Anti-mouse CD8 PE-Cy7        | Clone 53-6.7      | eBioscience/25-0081-82              |                              |
| Anti-mouse CD11c PE-Cy7      | Clone N418        | Thermo Fisher Scientific/25-0114-82 |                              |
| Anti-mouse PD-1-APC-Cy7      | Clone 29F.1A12    | BioLegend/135224                    |                              |
| Anti-mouse CD44-APC-Cy7      | Clone IM7         | BioLegend/103028                    |                              |
| Anti-mouse CD86-APC-Cy7      | Clone GL-1        | BioLegend/105029                    |                              |
| Anti-mouse CD8 $\alpha$      | Clone 2.43        | Bio X Cell/BP0061                   | CD8 <sup>+</sup> T depletion |
| Anti-mouse CD47              | Clone MIAP301     | Bio X Cell/BE0270                   | In vivo CD47                 |

|                                                     |                     |                                                                                           |                                     |
|-----------------------------------------------------|---------------------|-------------------------------------------------------------------------------------------|-------------------------------------|
|                                                     |                     |                                                                                           | blockade                            |
| Recombinant anti-6X His tag antibody                |                     | Abcam/ab245114                                                                            | Western blotting                    |
| L-asparaginase                                      | Polyclonal antibody | Abcam/ab55824                                                                             |                                     |
| Rabbit anti-FlaB                                    | Polyclonal Ab.      | A gift from Dr. Joon Haeng Rhee, Chonnam National University Medical school <sup>52</sup> |                                     |
| Anti-rabbit secondary antibody, HRP                 |                     | Invitrogen/31460                                                                          |                                     |
| Asparaginase antibody (HRP)                         |                     | GenTex/GTX40848                                                                           |                                     |
| Goat anti-rabbit secondary antibody Alexa Flour 488 |                     | Thermo scientific/A110088                                                                 |                                     |
| Wheat germ agglutinin-Alexa Flour 555 Conjugate     |                     | Thermo scientific/W32464                                                                  | Confocal immunofluorescence imaging |

**Table S2. CDI value of CRT3LFP combined with CNC018 bacteria in CT26 and MC38 tumor models**

| Average tumor volume (mm <sup>3</sup> ) | Control (PBS) | A (CRT3LFP) | B (CNC018) | AB (CRT3LFP plus CNC18) | CDI   | Interpretation |
|-----------------------------------------|---------------|-------------|------------|-------------------------|-------|----------------|
| CT26 tumor volume (day 15)              | 1661.725      | 1241.525    | 1063.05    | 377.45                  | 0.475 | Synergism      |
| MC38 tumor volume (day 9)               | 983.67        | 357.25      | 337.75     | 108.5                   | 0.885 | Synergism      |

CDI, coefficient of drug interaction;  $CDI = (AB/control)/[(A/control) \times (B/control)]$
