# Supplementary material
Source: Research Square preprint supplement (doi:10.21203/rs.3.rs-9071284/v1)
Supplement: Supplementary file 2 [file b596c3c6b343ac23dfb8f17a.docx]

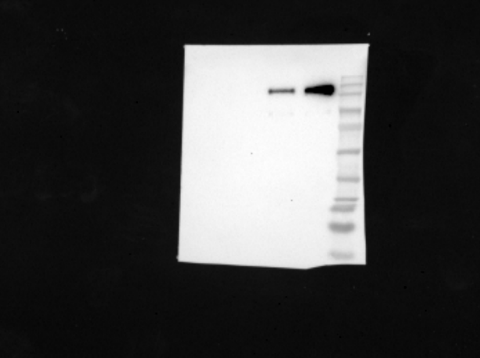


Figure 1C. Anti-His tag (right)


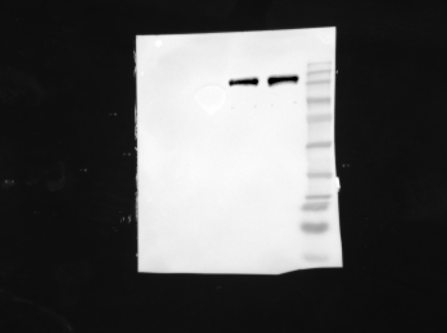


Figure 1C. Anti-L-ASNase (right)


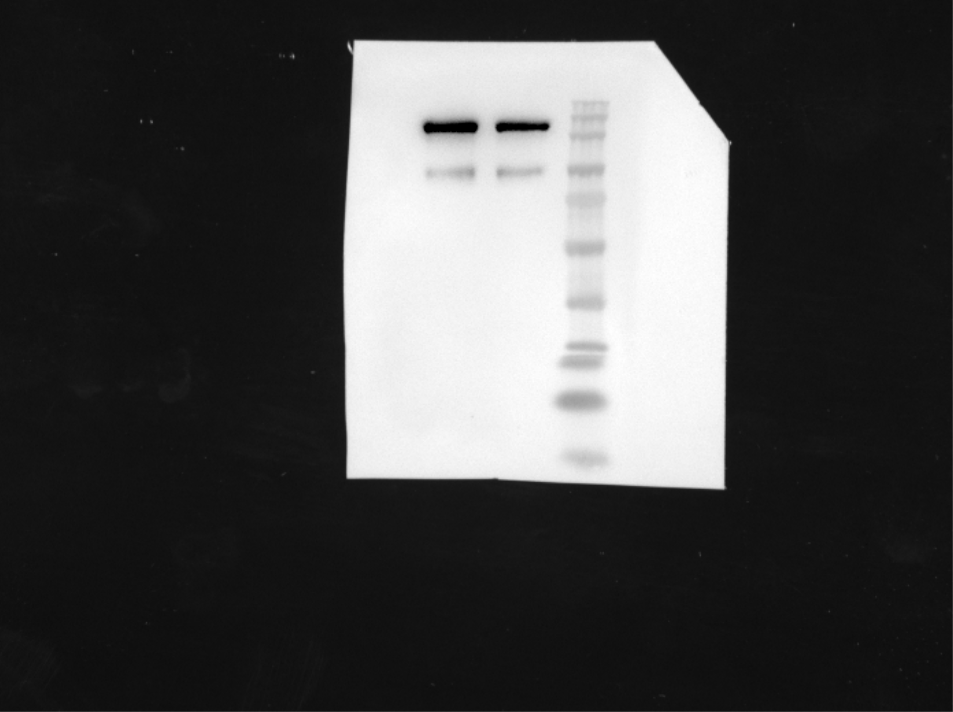


Figure 1C. Anti-FlaB (right)


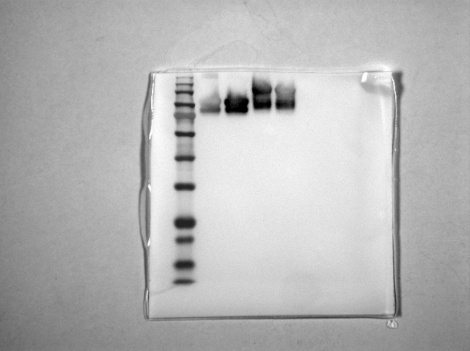


Figure 1C. Anti-His tag (left)
